# Supplementary material
Source: PubMed Central journal article supplement (PMC4160827)
Supplement: NIHMS227492-supplement-Supp_Fig_s1-s3.pdf [file NIHMS227492-supplement-Supp_Fig_s1-s3.pdf]

## **Evidence for the Slow Reaction of Hypoxia-Inducible Factor Prolyl Hydroxylase 2 with Oxygen**

Emily Flashman<sup>1</sup>, Lee M. Hoffart<sup>2</sup>, Refaat B. Hamed<sup>1</sup>, J. Martin Bollinger, Jr.<sup>2‡</sup>, Carsten Krebs<sup>2‡</sup> and Christopher J. Schofield<sup>1‡</sup>

<sup>1</sup> *Department of Chemistry and Oxford Centre for Integrative Systems Biology, 12 Mansfield Road, Oxford, OX1 3TA, U.K.*

<sup>2</sup> *Department of Chemistry and Department of Biochemistry and Molecular Biology, The Pennsylvania State University, University Park, PA 16802, U.S.A.*

‡Corresponding authors:      Email: christopher.schofield@chem.ox.ac.uk  
Tel. +44 1865 275625  
Fax: +44 1865 275674  
Email: cdk10@psu.edu  
Tel. +1 814 865 6089  
Fax: +1 814 865 2927  
Email: jmb21@psu.edu  
Tel. +1 814 863 5707  
Fax: +1 814 865 2927

Short title: Prolyl Hydroxylase 2 Reaction with Oxygen

Figure S1. Determination of rate constants for 2OG conversion to succinate and CODD hydroxylation

As seen in Figure 2 and described in the main text, LC-MS was used to monitor the time-dependent conversion of 2OG to succinate (at 5°C) in the presence (black circles) and absence (white circles) of CODD (shown on a logarithmic scale); MALDI MS was used to quantify CODD hydroxylation with time (red circles). In order to determine rate constants, data were fitted by the equation,  $f=y_0+a*(1-(-b*x))$ , using SigmaPlot™. Apparent first-order rate constants of  $(0.018 \pm 0.0014) \text{ s}^{-1}$  and  $(0.0006 \pm 0.0001) \text{ s}^{-1}$  were obtained for succinate production in the presence and absence of CODD, respectively. An apparent first-order rate constant of  $(0.013 \pm 0.003) \text{ s}^{-1}$  was obtained for hydroxylation of CODD.

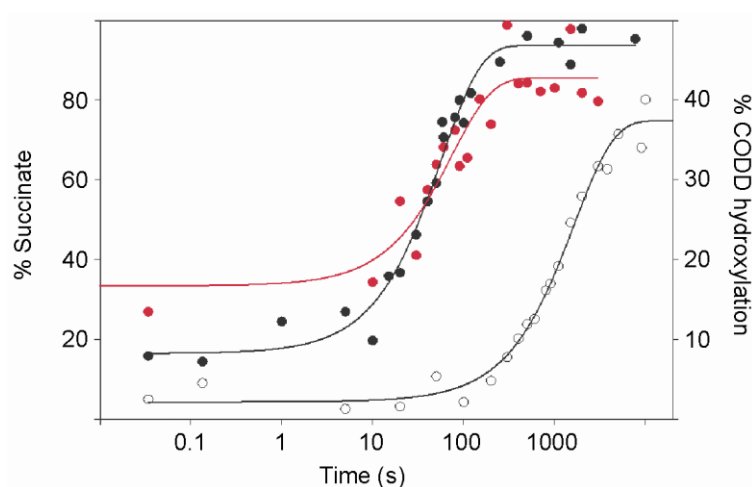

Figure S2. The PHD2.Fe.2OG and PHD2.Fe.2OG.CODD complexes demonstrate characteristic spectral features.

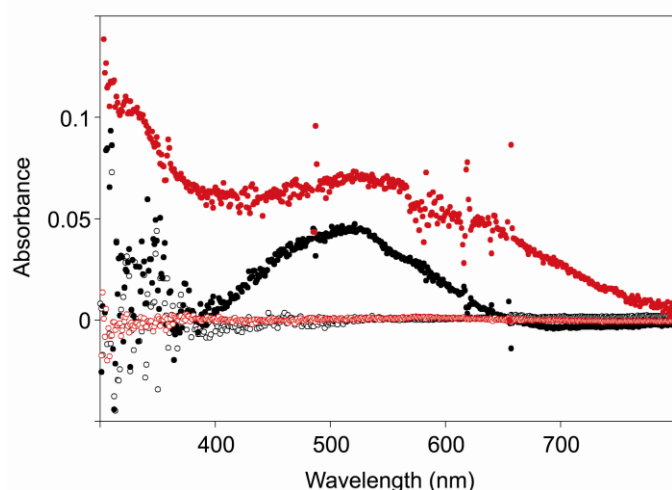

Addition of saturating 2OG to anoxic PHD2:Fe(II) (red open circles) and PHD2:Fe(II):CODD (black open circles) led to formation of the assigned PHD2:Fe(II):2OG (red filled circles) and PHD2:Fe(II):2OG:CODD complexes (black filled circles), with absorbance features at  $\lambda_{\text{max}}$  527nm and 521nm, respectively. All spectra shown are ‘blanked’ against the spectrum of anoxic PHD2:Fe(II). Such features have been previously observed in

other 2OG-dependent oxygenases and shown to arise due to a metal-to-ligand charge-transfer band upon bidentate 2OG coordination to the active site Fe(II) [1]. A change in  $\lambda_{\max}$  from ~530nm to ~520nm is often observed upon prime substrate binding.

Figure S3. UV-visible absorption spectra comparing rates of formation for the 320nm species in the presence of HIF-1 $\alpha$ <sub>556-574</sub> CODD peptide and His<sub>6</sub>-HIF<sub>530-698</sub> CODD protein substrates.

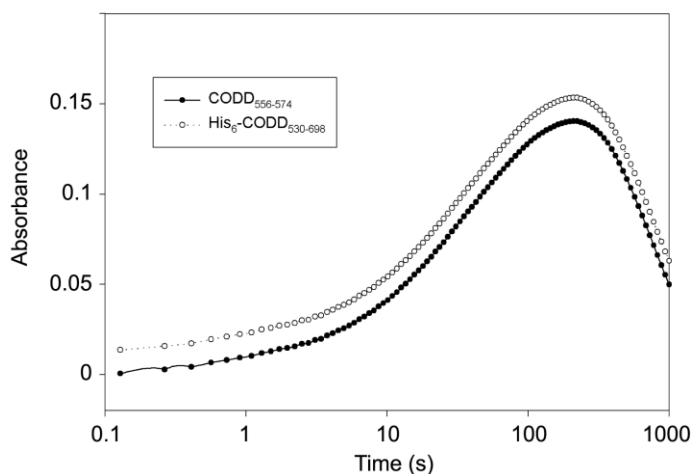

Oxygen-saturated buffer solution was rapidly mixed with a PHD2:Fe(II):2OG:CODD complex, where CODD was either a 19mer peptide (CODD<sub>556-574</sub>, black circles) or a longer HIF-1 $\alpha$  protein substrate (His<sub>6</sub>-CODD<sub>530-698</sub>, white circles), which has a greater affinity for PHD2 [2, 3]. UV-visible absorption spectra monitored over time (shown on a logarithmic scale) demonstrated comparable rates of formation and degradation of the 320nm species ( $0.06\text{s}^{-1}$  and  $0.001\text{s}^{-1}$ , respectively) in the presence of both substrates. This indicates that the slow rate of formation of this species observed in the presence of CODD<sub>556-574</sub> is not due to inefficient substrate binding.

## References

1. Pavel EG, Zhou J, Busby RW, Gunsior M, Townsend CA & Solomon EI (1998) Circular dichroism and magnetic circular dichroism spectroscopic studies of the non-heme ferrous active site in clavaminase and its interaction with alpha-ketoglutarate cosubstrate. *J Am Chem Soc* **120**, 743-753.
2. Ehrismann D, Flashman E, Genn DN, Mathioudakis N, Hewitson KS, Ratcliffe PJ & Schofield CJ (2007) Studies on the activity of the hypoxia-inducible-factor hydroxylases using an oxygen consumption assay. *Biochem J* **401**, 227-234.
3. Koivunen P, Hirsilä M, Kivirikko KI & Myllyharju J (2006) The length of peptide substrates has a marked effect on hydroxylation by the hypoxia-inducible factor prolyl 4-hydroxylases. *J Biol Chem* **281**, 28712-28720.
